# Supplementary material
Source: publisher site journal article supplement (https://www.spandidos-publications.com/1525/downloadSupplementary)

Figure S1. Body weight of mice was measured during CDDP and UA treatment. n=12 mice for each group. \*P<0.05 and \*\*P<0.01. UA, ursolic acid; CDDP, cisplatin.

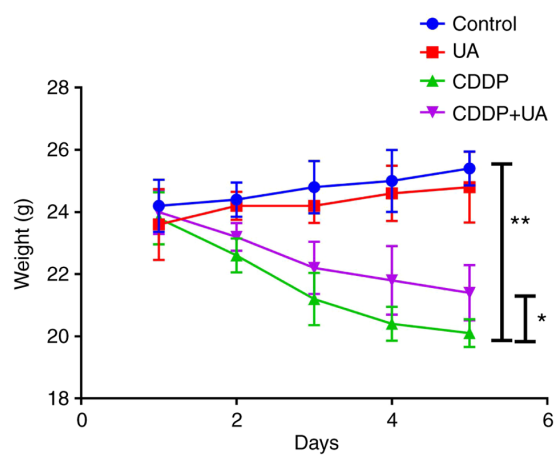

Supplement: Supplementary file 1 [file downloadSupplementary]
